# Supplementary material for: Anti-Inflammatory Activities of Isogosferol, a Furanocoumarin Isolated from Citrus junos Seed Shells through Bioactivity-Guided Fractionation
Source: PubMed Central journal article supplement (PMC6891542; doi:10.3390/molecules24224088), 2019-11-12
Supplement: molecules-24-04088-s001.pdf [file molecules-24-04088-s001.pdf]

# Supplementary data

**Isogosferol, a furanocoumarin isolated from *Citrus junos* seed shells using bioactivity-guided fractionation, inhibit the inflammatory mediators via ERK signaling**

**Hwa Young Song<sup>1</sup>, Ara Jo<sup>1</sup>, Jihun Shin, Eui Hyeon Lim, Ye Eun Lee, Da Eun Jeong and Mina Lee\***

College of Pharmacy, Suncheon National University, 255 Jungangno, Suncheon-si 57922, Jeonnam, Republic of Korea

\* Correspondence: Tel. 82-61-750-3764 Fax. 82-61-750-3708 E-mail: [minalee@sunchon.ac.kr](mailto:minalee@sunchon.ac.kr)

## **Supporting Information Available**

S1. <sup>1</sup>H-NMR (400 MHz, DMSO-*d*<sub>6</sub>) data of coumarins

S2. <sup>13</sup>C-NMR (100 MHz, DMSO-*d*<sub>6</sub>) data of coumarins

## S1. <sup>1</sup>H-NMR (400 MHz, DMSO-*d*<sub>6</sub>) data of coumarins

Compound 1:  $\delta$  8.13 (1H, d,  $J = 10.0$  Hz, H-4), 8.12 (1H, d,  $J = 2.4$  Hz, H-1'), 7.67 (1H, s, H-5), 7.1 (1H, d,  $J = 1.6$  Hz, H-2'), 6.43 (1H, d,  $J = 9.6$  Hz, H-3), 4.2 (3H, s, OCH<sub>3</sub>)

Compound 2:  $\delta$  8.13 (1H, d,  $J = 9.6$  Hz, H-4), 8.11 (1H, d,  $J = 2.4$  Hz, H-1'), 7.68 (1H, s, H-5), 7.08 (1H, d,  $J = 2.4$  Hz, H-2'), 6.42 (1H, d,  $J = 9.6$  Hz, H-3), 5.50 (1H, t,  $J = 7.2$  Hz, C-2''), 4.90 (2H, d,  $J = 7.2$  Hz, C-1''), 1.68 (3H, s, H-4''), 1.63 (3H, s, H-5'')

Compound 3:  $\delta$  8.14 (1H, d,  $J = 9.6$  Hz, H-4), 8.12 (1H, d,  $J = 2.4$  Hz, H-1'), 7.67 (1H, s, H-5), 7.09 (1H, d,  $J = 2.4$  Hz, H-2'), 6.43 (1H, d,  $J = 9.6$  Hz, H-3), 5.05 (1H, d,  $J = 1.2$  Hz, H-4'' $\alpha$ ), 4.87 (1H, d,  $J = 2.0$  Hz, H-4'' $\beta$ ), 4.37 (1H, m, H-2''), 4.32 (2H, m, H-1''), 1.75 (3H, s, H-5'')

Compound 4:  $\delta$  8.13 (1H, d,  $J = 10.0$  Hz, H-4), 8.12 (1H, d,  $J = 2.4$  Hz, H-1'), 7.08 (1H, d,  $J = 2.4$  Hz, H-2'), 6.42 (1H, d,  $J = 9.6$  Hz, H-3), 4.56 (1H, dd,  $J = 10.0, 2.4$  Hz, H-1'' $\alpha$ ), 4.33 (1H, dd,  $J = 10.2, 8.2$  Hz, H-1'' $\beta$ ), 3.78 (1H, m, H-2''), 1.14 (3H, s, H-4''), 1.06 (3H, s, H-5'')

Compound 5:  $\delta$  8.17 (1H, d,  $J = 10.0$  Hz, H-4), 8.08 (1H, d,  $J = 2.0$  Hz, H-1'), 7.38 (1H, d,  $J = 2.4$  Hz, H-2'), 6.74 (1H, d,  $J = 9.6$  Hz, H-3), 4.16 (3H, s, OCH<sub>3</sub>), 4.02 (3H, s, OCH<sub>3</sub>)

Compound 6:  $\delta$  8.18 (1H, d,  $J = 9.6$  Hz, H-4), 8.08 (1H, d,  $J = 2.8$  Hz, H-1'), 7.37 (1H, d,  $J = 2.4$  Hz, H-2'), 6.33 (1H, d,  $J = 10.4$  Hz, H-3), 5.20 (1H, d,  $J = 6.0$  Hz, H-1'' $\beta$ ), 4.95 (1H, d,  $J = 6.0$  Hz, H-1'' $\alpha$ ), 4.19 (1H, m, H-2''), 4.16 (3H, s, OCH<sub>3</sub>), 1.12 (3H, s, H-4''), 1.03 (3H, s, H-5'')

Compound 7:  $\delta$  8.13 (1H, d,  $J = 10.0$  Hz, H-4), 8.11 (1H, d,  $J = 2.4$  Hz, H-1'), 7.66 (1H, s, H-5), 7.08 (1H, d,  $J = 2.4$  Hz, H-2'), 6.42 (1H, d,  $J = 9.6$  Hz, H-3), 4.56 (1H, dd,  $J = 10.0, 2.4$  Hz, H-1'' $\alpha$ ), 4.34 (1H, dd,  $J = 10.0, 8.4$  Hz, H-1'' $\beta$ ), 3.78 (1H, td,  $J = 7.2, 2.4$  Hz, H-2''), 3.15 (3H, s, OCH<sub>3</sub>), 1.15 (3H, s, H-4''), 1.03 (3H, s, H-5'')

Compound 8:  $\delta$  7.92 (1H, d,  $J = 9.2$  Hz, H-4), 7.51 (1H, d,  $J = 8.4$  Hz, H-5), 6.77 (1H, dd,  $J = 8.0, 2.4$  Hz, H-6), 6.70 (1H, d,  $J = 1.6$  Hz, H-8), 6.19 (1H, d,  $J = 9.6$  Hz, H-3)

Compound 9:  $\delta$  7.99 (1H, d,  $J = 9.6$  Hz, H-4), 7.65 (1H, d,  $J = 8.8$  Hz, H-5), 6.93 (1H, dd,  $J = 10.8, 2.4$  Hz, H-6), 6.99 (1H, d,  $J = 2.4$  Hz, H-8), 5.18 (1H, d,  $J = 7.6$  Hz, H-1'), 3.68 (1H, d,  $J = 9.2$  Hz, H-2'), 3.52 (1H, d,  $J = 9.2$  Hz, H-3'), 3.39 (1H, d,  $J = 8.8$  Hz, H-4'), 3.48 (1H, d,  $J = 9.2$  Hz, H-5'), 3.80 (1H, d,  $J = 11.6$  Hz, H-6' $\alpha$ ), 3.58 (1H, d,  $J = 11.2$  Hz, H-6' $\beta$ ), 5.11 (1H, d,  $J = 1.6$  Hz, H-1''), 3.59 (1H, d,  $J = 1.6$  Hz, H-2''), 3.49 (1H, d,  $J = 10.0$  Hz, H-3''), 3.45 (1H, d,  $J = 9.6$  Hz, H-4''), 3.75 (1H, d,  $J = 9.6$  Hz, H-5''), 1.18 (3H, d,  $J = 6.4$  Hz, H-6'')

S2. <sup>13</sup>C-NMR (100 MHz, DMSO-*d*<sub>6</sub>) data of coumarins

|                      | 1          | 2     | 3     | 4     | 5     | 6     | 7     | 8     |   |
|----------------------|------------|-------|-------|-------|-------|-------|-------|-------|---|
| Position             | $\delta_C$ |       |       |       |       |       |       |       |   |
| 1                    | -          | -     | -     | -     | -     | -     | -     | -     | - |
| 2                    | 159.7      | 159.9 | 159.8 | 159.9 | 159.6 | 159.6 | 160.3 | 161.3 |   |
| 3                    | 114.2      | 114.3 | 114.2 | 114.2 | 112.6 | 112.5 | 114.4 | 111.4 |   |
| 4                    | 145.3      | 143.2 | 142.6 | 145.3 | 139.8 | 139.7 | 145.7 | 144.5 |   |
| 5                    | 113.9      | 114.2 | 113.8 | 113.8 | 144.3 | 145.3 | 114.1 | 129.7 |   |
| 6                    | 125.9      | 125.8 | 125.8 | 125.9 | 114.4 | 114.4 | 126.2 | 113.4 |   |
| 7                    | 147.9      | 147.9 | 147.8 | 147.8 | 149.4 | 149.6 | 148.0 | 160.4 |   |
| 8                    | 131.9      | 126.9 | 130.8 | 131.5 | 127.2 | 126.9 | 131.7 | 102.5 |   |
| 9                    | 142.4      | 139.2 | 142.6 | 141.9 | 143.1 | 143.2 | 142.9 | 155.5 |   |
| 10                   | 116.4      | 116.9 | 116.4 | 116.4 | 106.8 | 106.9 | 116.7 | 111.3 |   |
| 1'                   | 146.9      | 145.4 | 145.0 | 147.2 | 146.4 | 146.3 | 147.4 | -     |   |
| 2'                   | 107.1      | 107.1 | 107.1 | 107.1 | 105.7 | 105.6 | 107.4 | -     |   |
| 5-OCH <sub>3</sub>   | -          | -     | -     | -     | 60.8  | 60.8  | -     | -     |   |
| 8-OCH <sub>3</sub>   | 61.0       | -     | -     | -     | 61.3  | -     | -     | -     |   |
| 1''                  | -          | 69.4  | 75.8  | 75.2  | -     | 75.8  | 75.1  | -     |   |
| 2''                  | -          | 119.7 | 72.9  | 76.2  | -     | 76.7  | 76.5  | -     |   |
| 3''                  | -          | 130.6 | 145.3 | 74.8  | -     | 70.8  | 75.5  | -     |   |
| 4''                  | -          | 17.8  | 111.9 | 19.8  | -     | 24.4  | 22.3  | -     |   |
| 5''                  | -          | 25.5  | 18.4  | 22.1  | -     | 27.2  | 20.1  | -     |   |
| 3''-OCH <sub>3</sub> | -          | -     | -     | -     | -     | -     | 49.2  | -     |   |
